# Supplementary material for: A study on a telo21 G-quadruplex DNA specific binding ligand: enhancing the molecular recognition ability via the amino group interactions
Source: Royal Society of Chemistry journal article supplement (doi:10.1039/c8ra03833c), 2018-01-01
Supplement: c8ra03833c1.pdf [file c8ra03833c1.pdf]

## Electronic Supplementary Information

### A Study on the Telo21 G-quadruplex DNA specific binding ligand: Enhancing the molecular recognition ability via the amino group interactions

Dongli Li<sup>a,b,†</sup>, Jin-Qiang Hou<sup>c,†</sup>, Wei Long<sup>c</sup>, Yu-Jing Lu<sup>b,c</sup>, Wing-Leung Wong<sup>a,b,\*</sup> and Kun Zhang<sup>a,b,\*</sup>

<sup>a</sup> School of Chemical and Environmental Engineering, Wuyi University, Jiangmen 529020, P.R. China.

<sup>b</sup> International Healthcare Innovation Institute (Jiangmen), Wuyi University, Jiangmen 529020, P.R. China.

<sup>c</sup> Institute of Natural Medicine and Green Chemistry, School of Chemical Engineering and Light Industry, Guangdong University of Technology, Guangzhou 510006, P. R. China.

<sup>†</sup> The authors contributed equally to this work

\* Corresponding author

E-mail: kzhang@gdut.edu.cn;

Tel: +86-20-39322235

E-mail: wingleung@wyu.edu.cn

Tel: +86-0750-3299391

**Table S1.** Sequences of oligonucleotides used in the present study

| Abbreviation | Sequence                               | Structure/origin      |
|--------------|----------------------------------------|-----------------------|
| dA21         | AAAAAAAAAAAAAAAAAAAAA                  | single-stranded       |
| ds26         | CAATCGGATCGAATTCGATCCGATTG             | Duplex                |
| telo21       | GGGTTAGGGTTAGGGTTAGGG                  | Telomere G-quadruplex |
| RNA          | 16S- and 23S-Ribosomal from E. coli    | Duplex                |
| F21T         | FAM-d(GGG[TTAGGG] <sub>3</sub> )-TAMRA | Telomere G-quadruplex |
| F10T         | FAM-dTATAGCTA-HEG-TATAGCTATAT-TAMRA    | Duplex                |

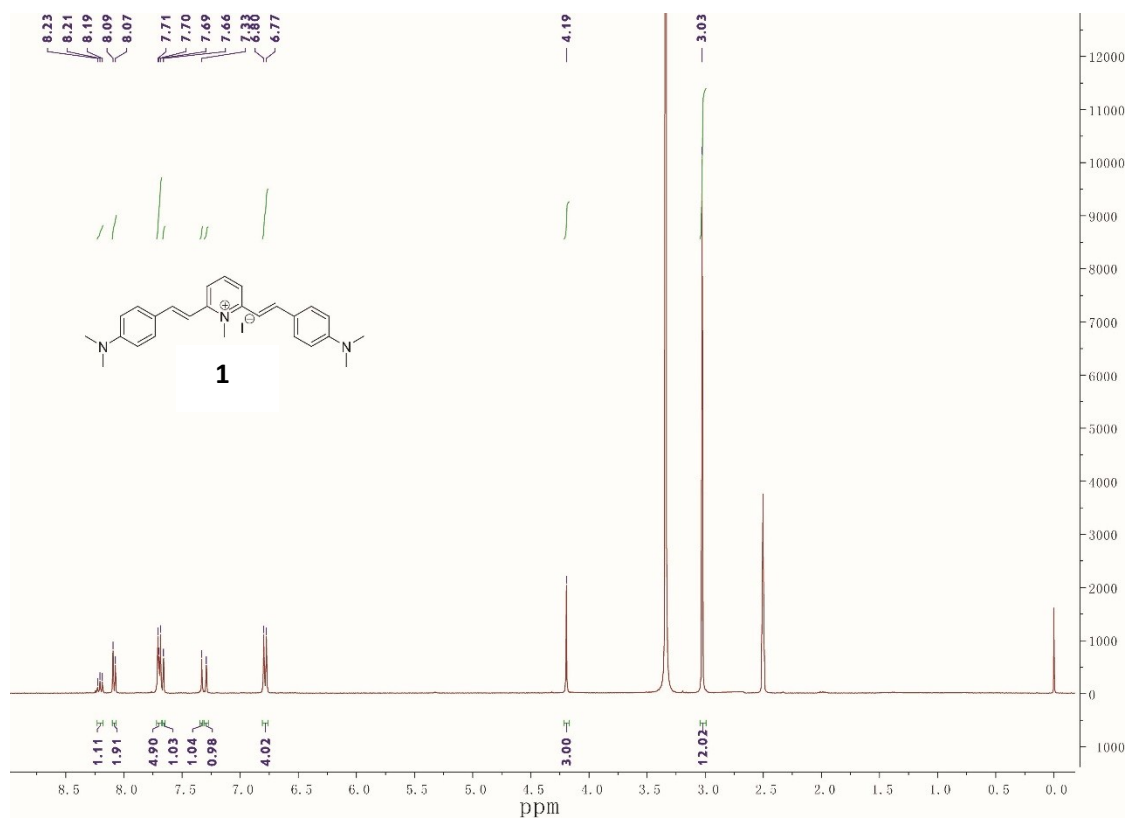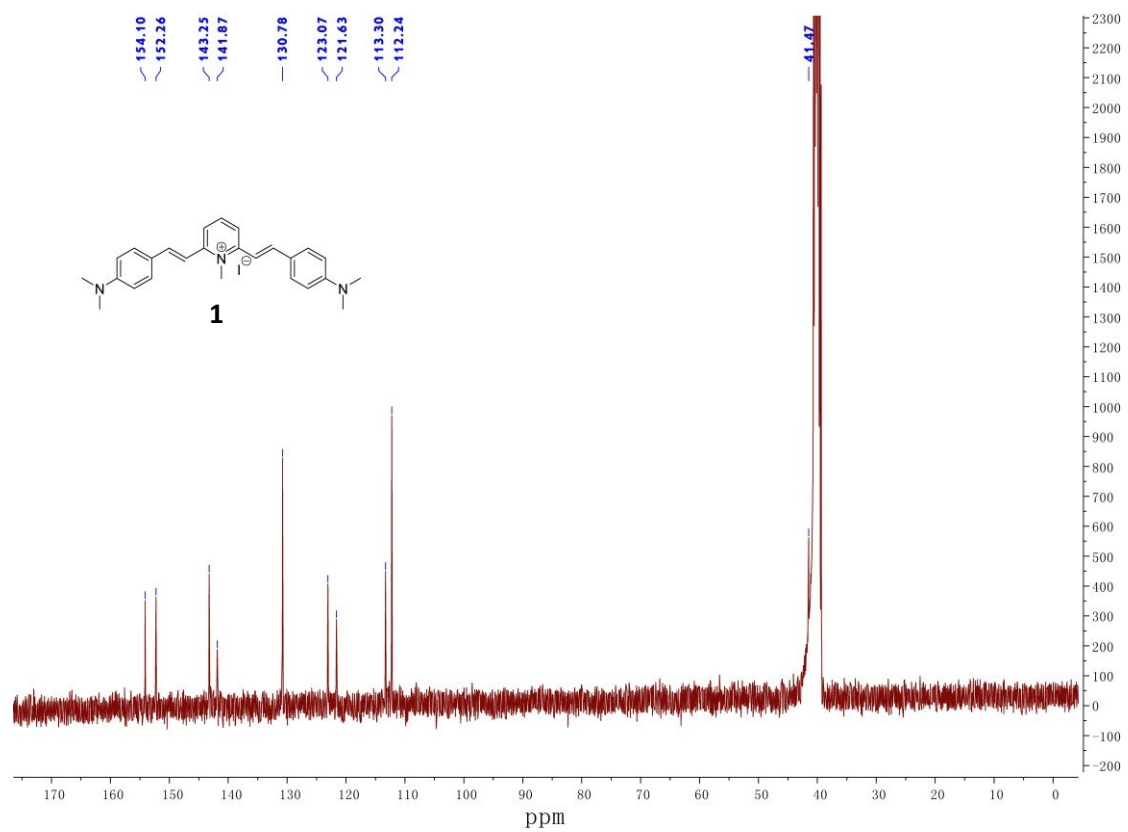

Figure. S1  $^1\text{H}$  NMR and  $^{13}\text{C}$  NMR of compound **1**

Data File: F: 3b.lcd

| Elmt | Val. | Min | Max | Use Adduct |
|------|------|-----|-----|------|------|-----|-----|------|------|-----|-----|------|------|-----|-----|------------|
| H    | 1    | 0   | 50  | O    | 2    | 0   | 0   | S    | 2    | 0   | 3   | I    | 3    | 0   | 1   | H          |
| C    | 4    | 0   | 50  | F    | 1    | 0   | 0   | Cl   | 1    | 0   | 0   |      |      |     |     | Na         |
| N    | 3    | 0   | 4   | P    | 3    | 0   | 0   | Br   | 1    | 0   | 0   |      |      |     |     |            |

Error Margin (mDa): 5.0  
 DBE Range: -2.0 - 1000.0  
 Electron Ions: both  
 HC Ratio: unlimited  
 Apply N Rule: yes  
 Use MSn Info: yes  
 Max Isotopes: all  
 Isotope RI (%): 1.00  
 MSn Iso RI (%): 75.00  
 MSn Logic Mode: AND  
 Isotope Res: 10000  
 Max Results: 800

Event#: 1 MS(E+) Ret. Time : 1.485 -> 1.485 Scan#: 298 -> 298

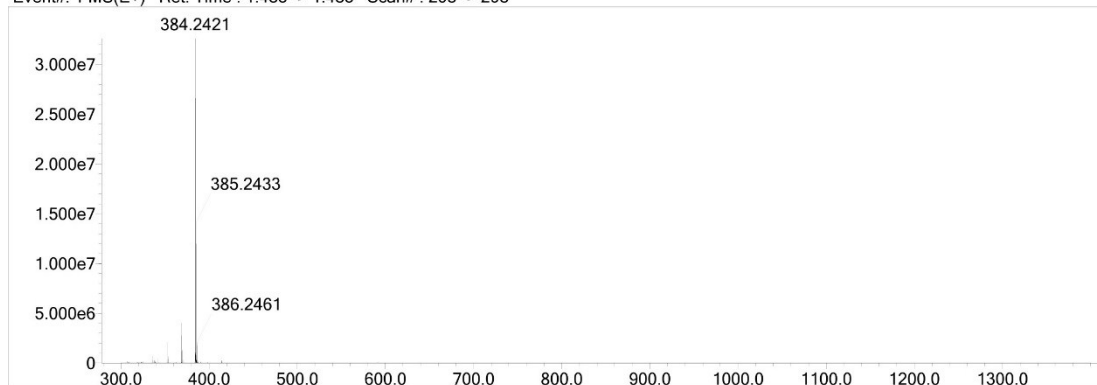

Measured region for 384.2421 m/z

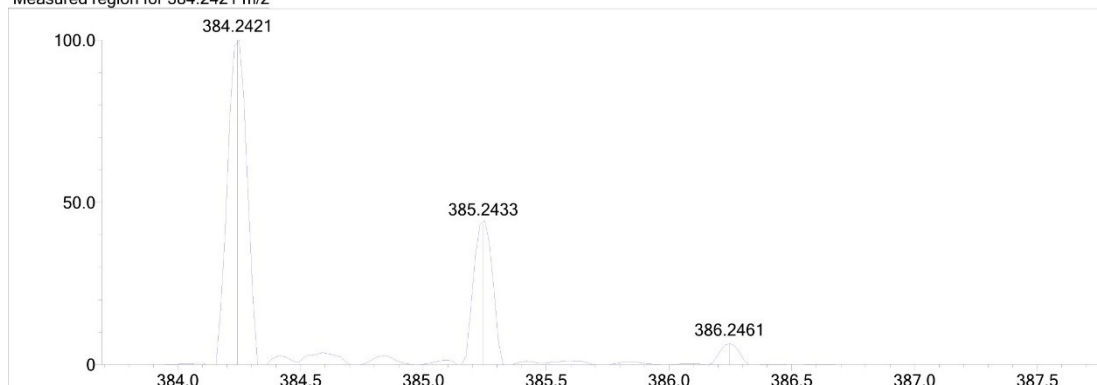

C26 H29 N3 [M+H]<sup>+</sup> : Predicted region for 384.2434 m/z

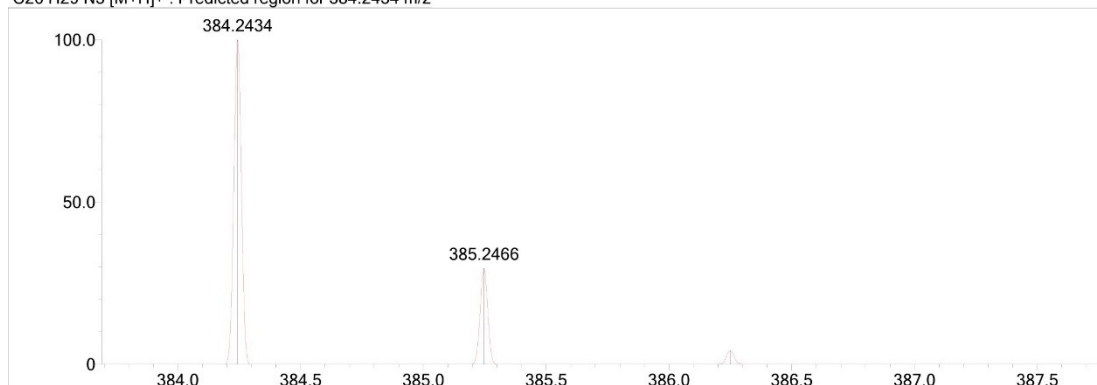

| Rank | Score | Formula (M)                                    | Ion                | Meas. m/z | Pred. m/z | Df. (mDa) | Df. (ppm) | Iso   | DBE  |
|------|-------|------------------------------------------------|--------------------|-----------|-----------|-----------|-----------|-------|------|
| 2    | 46.83 | C <sub>26</sub> H <sub>29</sub> N <sub>3</sub> | [M+H] <sup>+</sup> | 384.2421  | 384.2434  | -1.3      | -3.38     | 49.80 | 14.0 |

Figure. S2 HR-MS spectra of compound 1
